# Supplementary material
Source: PubMed Central journal article supplement (PMC2538621)
Supplement: NIHMS58422-supplement-Suppl_.pdf [file NIHMS58422-supplement-Suppl_.pdf]

## Lipid-rhodopsin hydrophobic mismatch alters rhodopsin helical content

Olivier Soubias, Shui-Lin Niu, Drake C. Mitchell, and Klaus Gawrisch

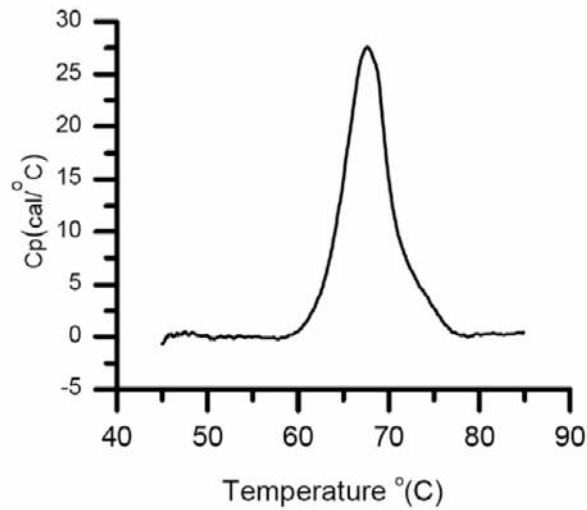

Thermal denaturation of dark adapted rhodopsin in 14:0-14:1-PC, molar ratio 1/250, measured by differential scanning calorimetry (DSC) at a scanning rate of  $1^\circ\text{C}/\text{min}$ . The baseline obtained from a second heating scan following the irreversible thermal denaturation was subtracted from the initial heating scan.
